# Supplementary material for: NFAT-Specific Inhibition by dNP2-VIVIT Ameliorates Autoimmune Encephalomyelitis by Regulation of Th1 and Th17
Source: PubMed Central journal article supplement — Mol Ther Methods Clin Dev. 2019 Oct 23;16:32–41. doi: 10.1016/j.omtm.2019.10.006 (PMC6849366; doi:10.1016/j.omtm.2019.10.006), 2019-10-23
Supplement: mmc1.pdf [file mmc1.pdf]

**OMTM, Volume 16**

**Supplemental Information**

**NFAT-Specific Inhibition by dNP2-VIVIT  
Ameliorates Autoimmune Encephalomyelitis  
by Regulation of Th1 and Th17**

**Hong-Gyun Lee, Li-Kyung Kim, and Je-Min Choi**

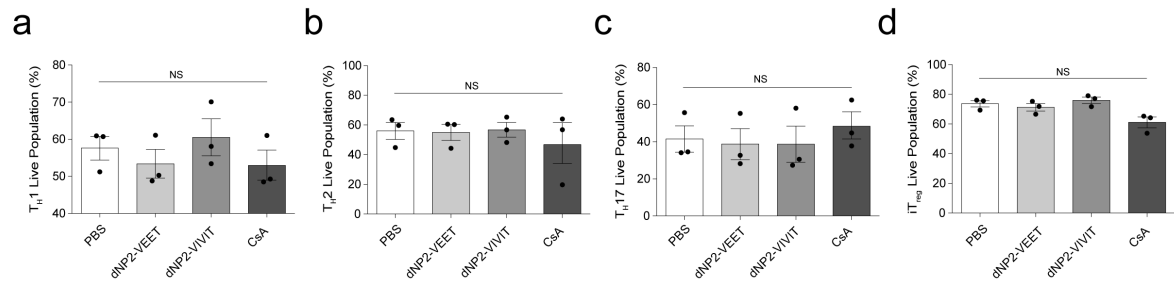

**Supplementary Figure 1** NFAT-specific inhibition by dNP2-VIVIT showed no toxicity. **(a-d)** Naïve ( $CD4^+CD25^-CD62L^{high}CD44^{low}$ ) T cells were differentiated into  $T_{H1}$ ,  $T_{H2}$ ,  $T_{H17}$ , and  $iT_{reg}$  skewing conditions by antiCD3/CD28 stimulation for 5 days. Cells were incubated with  $1\mu M$  dNP2-VEET, dNP2-VIVIT and 20ng/mL CsA. The frequencies of Live/Dead population were analyzed by flow cytometry. Data are presented as mean  $\pm$  SEM of three independent experiments (n=3); statistical analysis by two-tailed Student's t-test. NS, not significant
